# Supplementary material for: Facilitated sequence assembly using densely labeled optical DNA barcodes: A combinatorial auction approach
Source: PubMed Central journal article supplement (PMC5844556; doi:10.1371/journal.pone.0193900), 2018-03-09
Supplement: pone.0193900.s002.pdf [file pone.0193900.s002.pdf]

**Table S.1. Comparison between match scores (maximum Pearson correlation coefficients,  $\hat{C}$ ) using the new competitive binding parameters and the old method from Ref. [30] in the main text.**

| Experimental barcode   | pEC005A | pEC005b | pUUH   | p4.2.1.1 |
|------------------------|---------|---------|--------|----------|
| Length (kbp)           | 70      | 138     | 221    | 152      |
| $\hat{C}$ , new theory | 0.9647  | 0.9322  | 0.9417 | 0.9138   |
| $\hat{C}$ , old theory | 0.9526  | 0.8623  | 0.9115 | 0.8751   |

**S1 Table.**
